# Supplementary material for: Cell-traversal protein for ookinetes and sporozoites (CelTOS) formulated with potent TLR adjuvants induces high-affinity antibodies that inhibit Plasmodium falciparum infection in Anopheles stephensi
Source: Springer Nature journal article supplement (doi:10.1186/s12936-019-2773-3), 2019-04-24
Supplement: MOESM1 [file 16674294]

### Proliferation of splenocytes

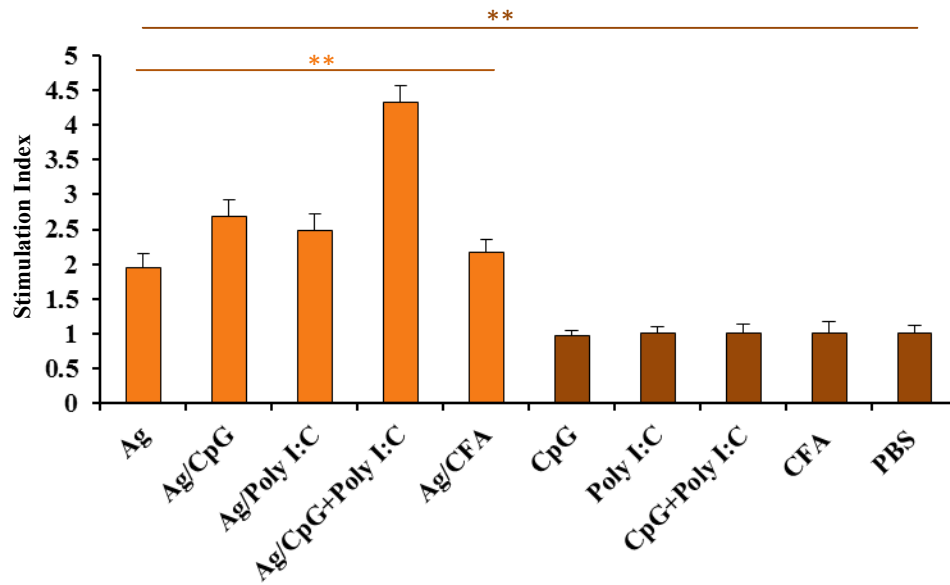

#### Additional file 1: Figure S4

**Lymphocyte proliferation in cultured splenocyte cells of immunized mice (groups 1-10) in the presence of rPfCelTOS *in vitro*.** Spleens from each vaccine (1-5) and control (6-10) groups (four mice per group) were removed, and lymphocyte proliferation was evaluated using the MTT assay. A significant lymphocyte proliferation in the presence of rPfCelTOS antigen was observed in mice group 4 in comparison with groups 1-3, and 5 ( $P < 0.001$ , one-way ANOVA).

Data was analyzed using one way ANOVA followed by Tukey's HSD post hoc test.

**\*\* $P < 0.001$ .**

*Ag* rPfCelTOS antigen
