# Supplementary material for: Cell-traversal protein for ookinetes and sporozoites (CelTOS) formulated with potent TLR adjuvants induces high-affinity antibodies that inhibit Plasmodium falciparum infection in Anopheles stephensi
Source: Springer Nature journal article supplement (doi:10.1186/s12936-019-2773-3), 2019-04-24
Supplement: MOESM1 [file 16674294]

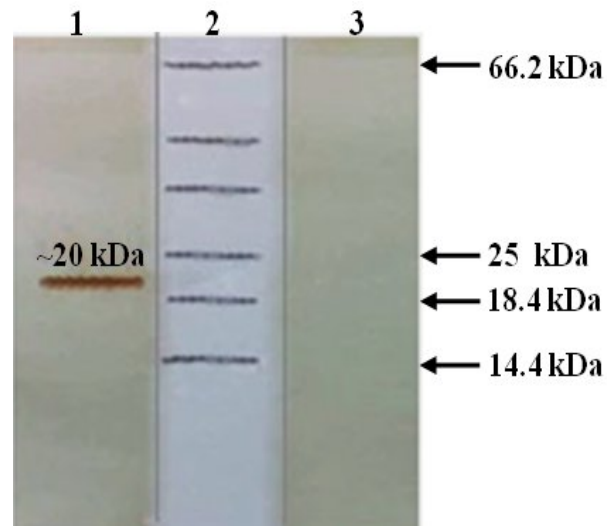

**Additional file 1: Figure S1**

**Western blot analysis of expressed PfCelTOS in *E. coli*.**

Western blot analysis of rPfCelTOS using pooled sera derived from the immunized mice with rPfCelTOS (groups 1–5) showed that anti-rPfCelTOS IgG antibodies recognized the purified rPfCelTOS antigen (a single band with a molecular mass of ~ 20 kDa, lane 1). Molecular weight marker (MW, Thermo Fisher Scientific, USA) was shown in lane 2. There was no recognition of rPfCelTOS by normal mouse sera (lane 3), indicating rPfCelTOS-specific responses.
