# Supplementary material for: Cell-traversal protein for ookinetes and sporozoites (CelTOS) formulated with potent TLR adjuvants induces high-affinity antibodies that inhibit Plasmodium falciparum infection in Anopheles stephensi
Source: Springer Nature journal article supplement (doi:10.1186/s12936-019-2773-3), 2019-04-24
Supplement: MOESM1 [file 16674294]

### Anti-rPfCelTOS IgG and its subclass antibodies

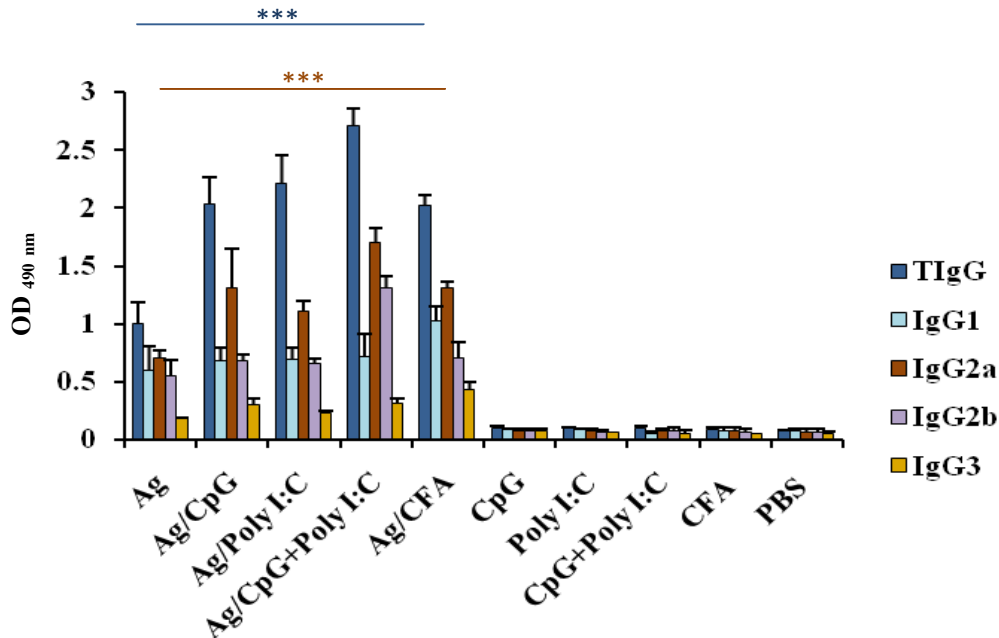

#### Additional file 1: Figure S3

**Comparison of the anti-rPfCelTOS IgG, IgG1, IgG2a, IgG2b, and IgG3 antibodies in all vaccinated mice groups (1-5) and control mice groups (6-10) on day 38 of the first immunization.** Control mice groups received PBS 1× alone or in combination with CpG, Poly I:C, CpG + Poly I:C, and CFA/IFA adjuvants. All experiments were performed with 1:200 dilution sera. The bars and error bars show the mean OD<sub>490nm</sub> and standard deviation (SD) in each mouse group (n = 16), respectively. Data represents means from three separate ELISA experiments. The level of IgG and IgG2a in the non-adjuvanted mice group 1 that received rPfCelTOS alone were significantly lower than adjuvanted mice groups 2-5 that received rPfCelTOS antigen formulated in CpG, Poly I:C adjuvant alone, in combination with CpG + Poly I:C, and reference adjuvant CFA/IFA ( $P < 0.0001$ , one-way ANOVA).

\*\*\* $P < 0.0001$

Ag rPfCelTOS, TIgG Total IgG
